# Supplementary material for: Submicron Nonporous Silica Particles for Enhanced Separation Performance in pCEC
Source: MDPI journal article supplement (doi:10.3390/molecules28083542), 2023-04-17
Supplement: s1 [file s1]

Supplementary Material for

## **Submicron nonporous silica particles for enhanced separation performance in pCEC**

Qing Liu<sup>1,2</sup>, Chao Yan<sup>2\*</sup> and Yan Wang<sup>2\*</sup>

<sup>1</sup> Hubei Province Key Laboratory of Occupational Hazard Identification and Control,  
School of Medicine, Wuhan University of Science and Technology, Wuhan 430065,  
China

<sup>2</sup> School of Pharmacy, Shanghai Jiao Tong University, Shanghai 200240, China

### **Corresponding Author**

\* Phone: +86-021-3420-5988.Fax: +86-021-3420-5908

E-mail: [chaoyan@sjtu.edu.cn](mailto:chaoyan@sjtu.edu.cn) (Chao Yan).

\* Phone: +86-021-3420-5673.Fax: +86-021-3420-5908

E-mail: [wangyan11@sjtu.edu.cn](mailto:wangyan11@sjtu.edu.cn) (Yan Wang).

**Table S1.** The repeatability (three replicates, columns packed by 300, 420, 500, 620, 820 nm nonporous particles) of naphthalene and seven PAHs in pCEC ( $n=3$ ).

| PAHs              | 300 nm        |         |                           |         | 420 nm      |         |                         |         | 500 nm      |         |                         |         | 620 nm      |         |              |         | 820 nm      |         |                         |         |
|-------------------|---------------|---------|---------------------------|---------|-------------|---------|-------------------------|---------|-------------|---------|-------------------------|---------|-------------|---------|--------------|---------|-------------|---------|-------------------------|---------|
|                   | $t_R^a$ (min) | RSD (%) | $A^b$ ( $\mu V \cdot s$ ) | RSD (%) | $t_R$ (min) | RSD (%) | $A$ ( $\mu V \cdot s$ ) | RSD (%) | $t_R$ (min) | RSD (%) | $A$ ( $\mu V \cdot s$ ) | RSD (%) | $t_R$ (min) | RSD (%) | Avrea (mV/s) | RSD (%) | $t_R$ (min) | RSD (%) | $A$ ( $\mu V \cdot s$ ) | RSD (%) |
| Naphthalene       | 2.87          | 1.20    | 1081                      | 0.32    | 2.94        | 0.62    | 2337                    | 1.21    | 2.66        | 0.02    | 950                     | 0.63    | 3.50        | 0.26    | 5228         | 0.07    | 4.32        | 0.25    | 1047                    | 4.63    |
| Acenaphthylene    | 3.04          | 1.61    | 2164                      | 1.18    | 3.19        | 0.61    | 3063                    | 1.25    | 2.78        | 0.02    | 1287                    | 0.89    | 3.79        | 0.22    | 5123         | 1.19    | 4.65        | 0.30    | 1467                    | 4.91    |
| Fluorene          | 3.45          | 0.62    | 2464                      | 0.97    | 3.59        | 0.60    | 3761                    | 1.82    | 3.06        | 0.02    | 1592                    | 1.01    | 4.31        | 0.22    | 6229         | 0.95    | 5.33        | 0.41    | 1747                    | 6.09    |
| Phenanthrene      | 3.69          | 0.16    | 3986                      | 1.46    | 3.95        | 0.59    | 4797                    | 0.97    | 3.24        | 0.04    | 1949                    | 2.05    | 4.72        | 0.17    | 7814         | 1.14    | 5.83        | 0.50    | 2519                    | 2.04    |
| Anthracene        | 3.87          | 0.62    | 3251                      | 0.02    | 4.18        | 0.59    | 3103                    | 1.60    | 3.42        | 0.02    | 1182                    | 3.64    | 4.99        | 0.15    | 6975         | 1.27    | 6.22        | 0.52    | 2135                    | 0.89    |
| Fluoranthene      | 4.34          | 0.20    | 2967                      | 0.51    | 4.81        | 0.56    | 2990                    | 2.29    | 3.73        | 0.05    | 1145                    | 3.14    | 5.74        | 0.12    | 5034         | 1.88    | 7.13        | 0.66    | 1418                    | 2.50    |
| Benzanthracene    | 5.76          | 0.65    | 2980                      | 3.17    | 6.80        | 0.61    | 2911                    | 0.70    | 4.93        | 0.04    | 667                     | 4.05    | 7.97        | 0.21    | 4133         | 4.91    | 10.25       | 0.95    | 1241                    | 4.63    |
| Benzofluoranthene | 7.58          | 0.04    | 1525                      | 2.26    | 9.39        | 0.75    | 3536                    | 2.04    | 6.45        | 0.04    | 449                     | 0.56    | 10.76       | 0.40    | 4182         | 7.40    | 14.23       | 1.30    | 1457                    | 1.13    |

<sup>a</sup>  $t_R$  (min) = Average Retention time.

<sup>b</sup>  $A$  (mV/s) = Average Peak area.

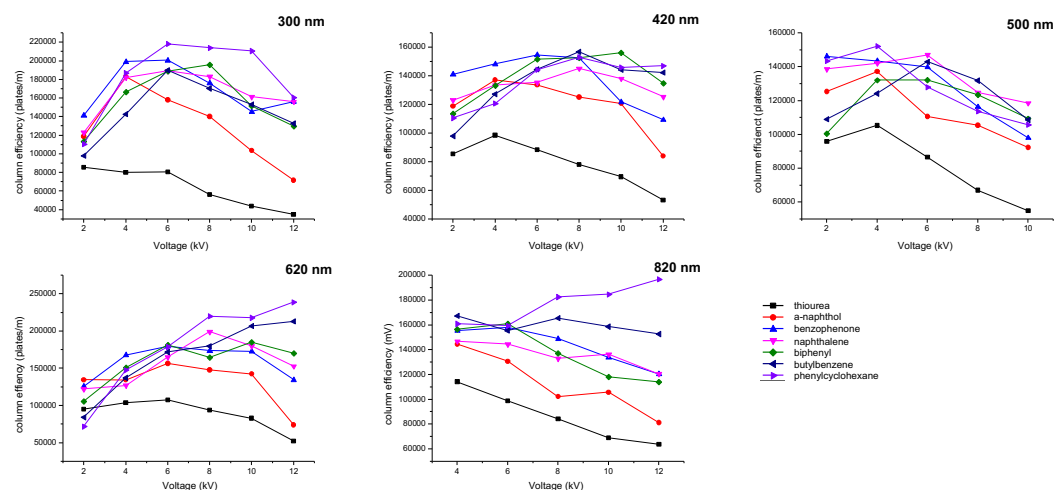

**Figure S1.** Column efficiency curves of thiourea and six aromatic compounds in 300, 420, 500, 620, 820 nm non-porous submicron packed columns. Peaks: 1) Thiourea; 2) a-naphthol; 3) benzophenone; 4) naphthalene; 5) biphenyl; 6) butylbenzene and 7) phenylcyclohexane.

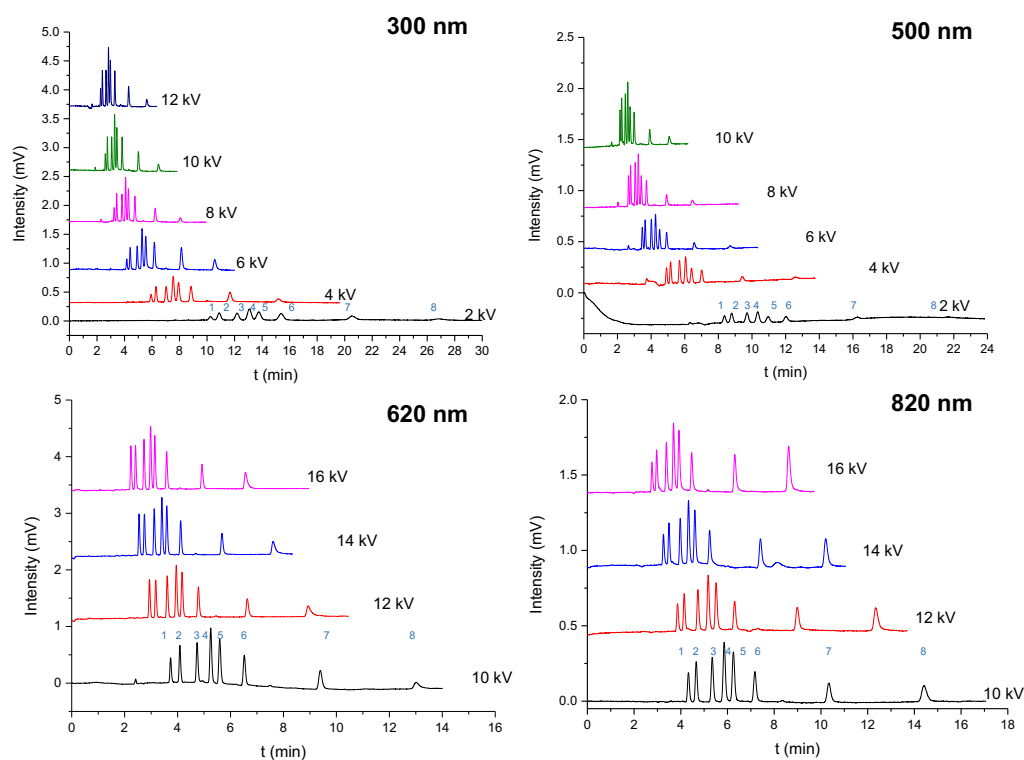

**Figure S2.** pCEC separation of eight PAHs at voltages of 2 kV to 16 kV on the columns packed with 300, 420, 500, 620, and 820 nm particles. Experimental conditions: Column: 100  $\mu\text{m}$  i.d. x 100/300 mm (effective/total length); Pressure = 15.5 MPa; Mobile phase: acetonitrile–10 mM phosphate buffer (60:40, v/v); pH = 7.8; Split ratios 800:1. Peaks: 1) Naphthalene, 2) Acenaphthylene; 3) Fluorene; 4) Phenanthrene; 5) Anthracene; 6) Fluoranthene; 7) Benzanthracene and 8) Benzofluoranthene.

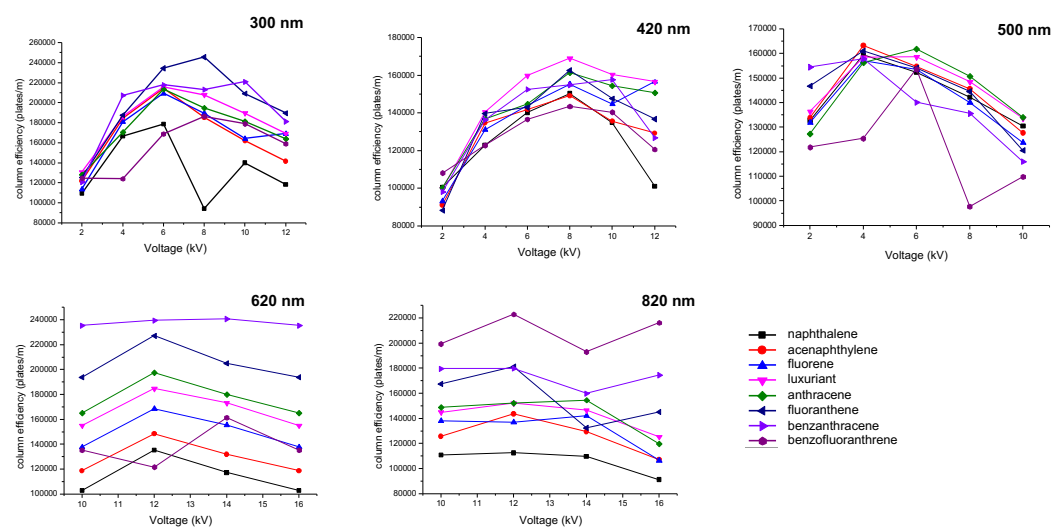

**Figure S3.** Column efficiency curves of eight PAHs on the columns packed with 300, 420, 500, 620, and 820 nm particles. Peaks: 1. naphthalene; 2. acenaphthylene; 3. fluorene; 4. luxuriant; 5. anthracene; 6. fluoranthene; 7. benzantracene; 8. Benzofluoranthrene.

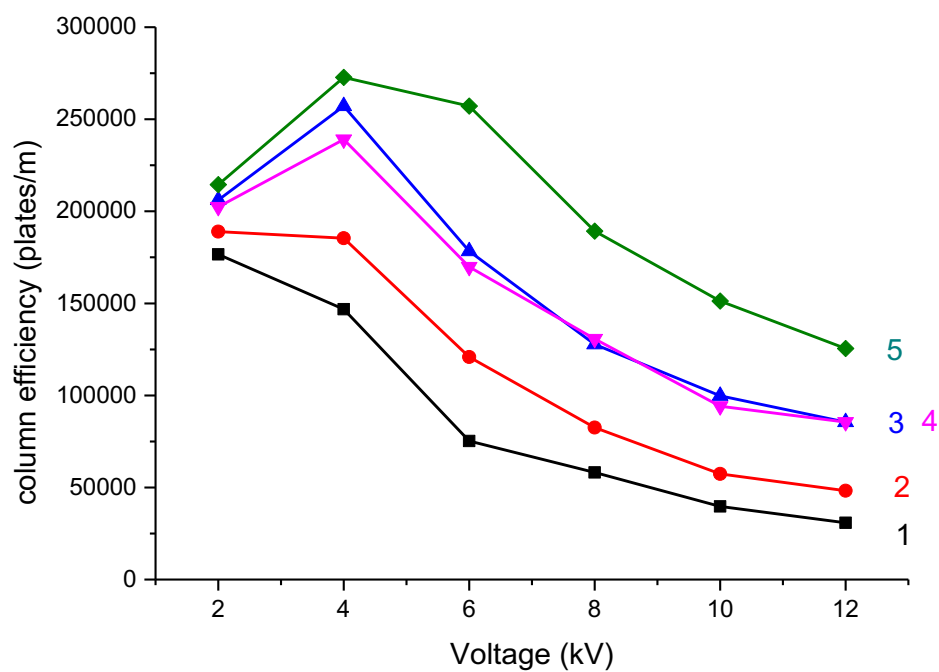

**Figure S4.** Column efficiency curves of five Estrogens in 300 nm non-porous submicron packed column. 1) E3; 2) BPA; 3) E2; 4) E1; 5) HE.
